# Supplementary material
Source: PubMed Central journal article supplement (PMC2861465)
Supplement: tpc.109.065946_1.pdf [file tpc.109.065946_1.pdf]

Supplemental Data. Mara et al. Plant Cell. (2010). 10.1105/tpc.109.065946

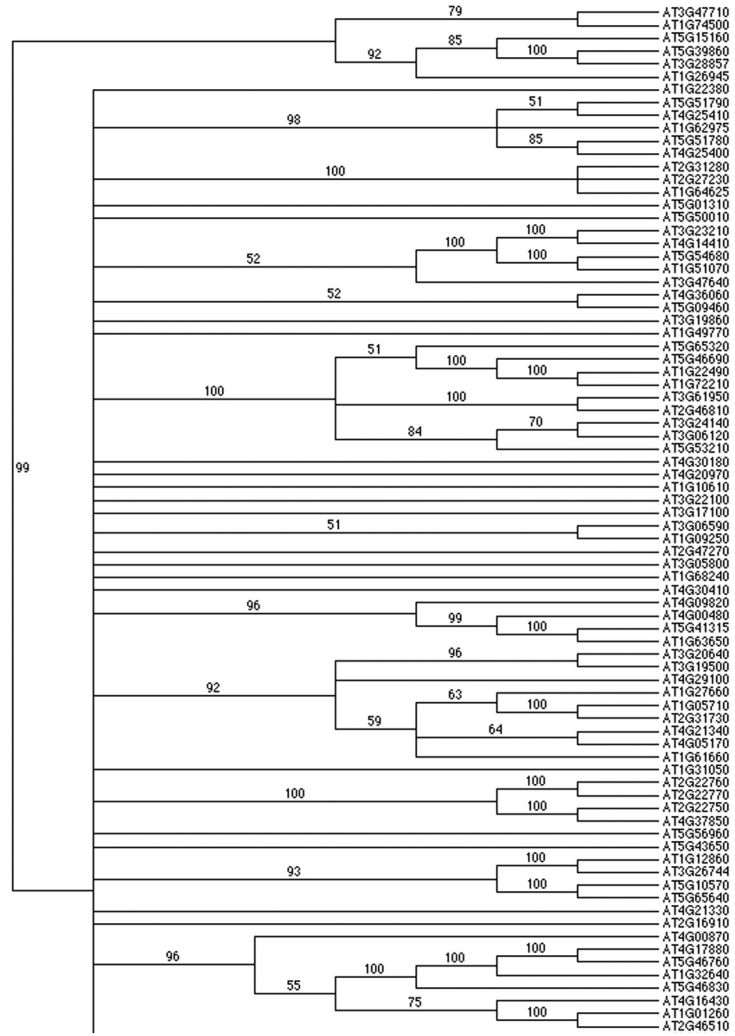

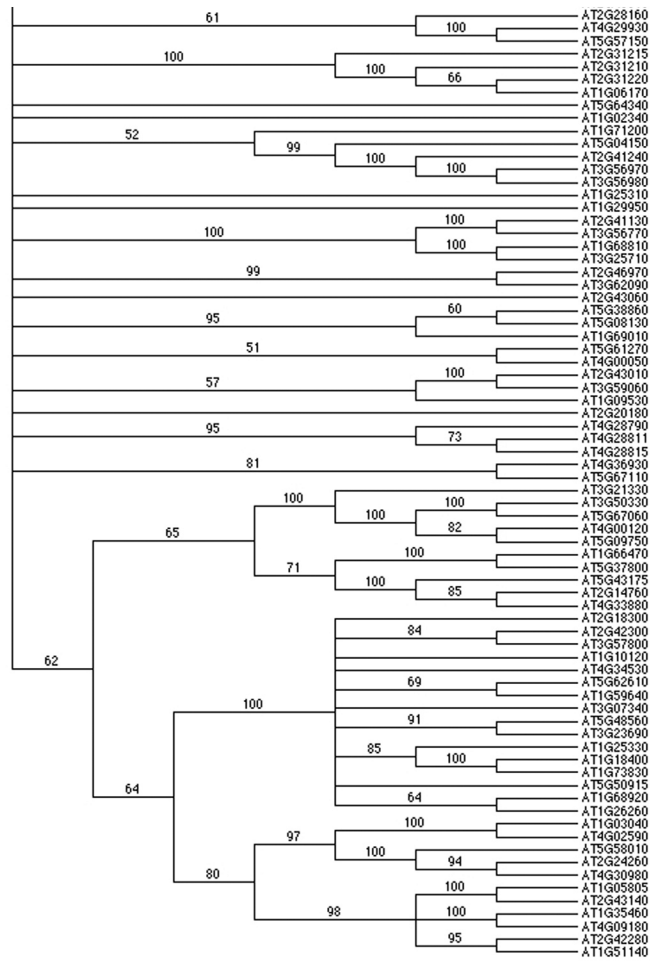

Supplemental Figure 1. Neighbor joining analysis of 154 Arabidopsis bHLH genes. Clade containing bHLH genes described in this paper is shown with a vertical line. Bootstrap values of >50% are shown.

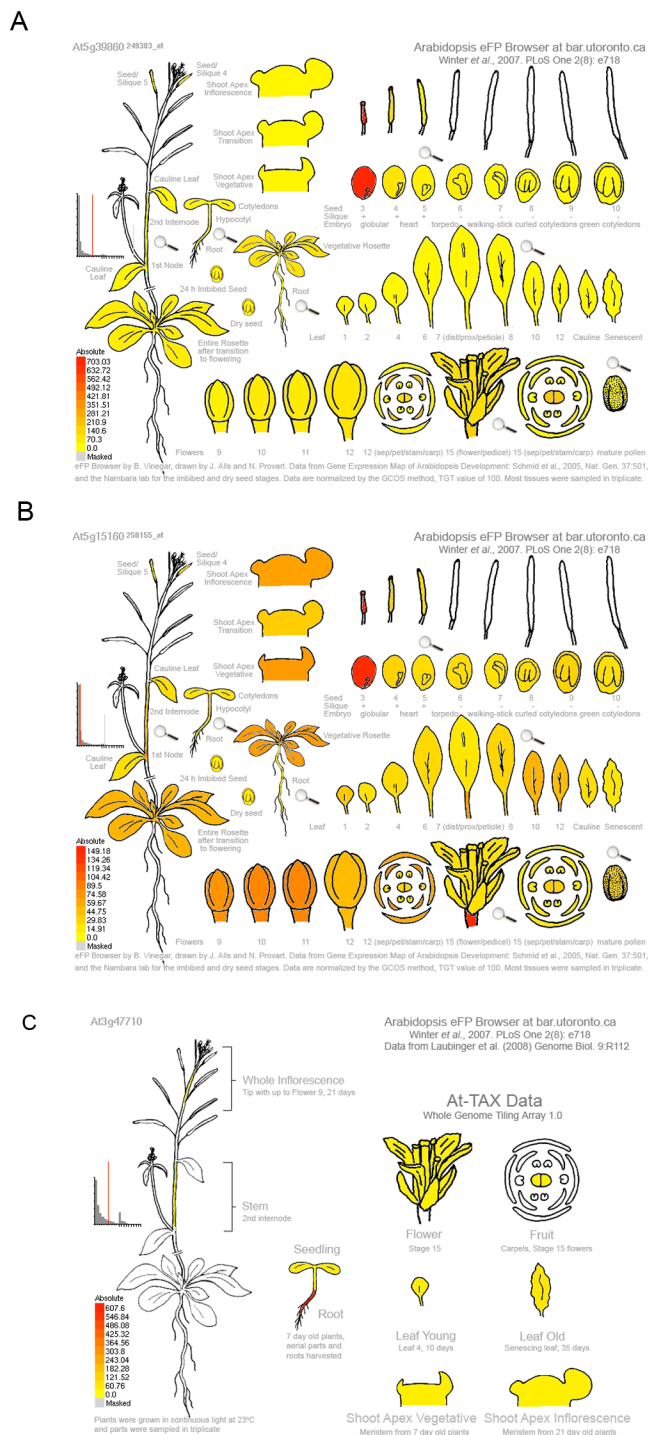

Supplemental Figure 2. Digital expression profiling of BNQ1 (At5g39860), BNQ2 (At5g15160) and BNQ3 (At3g47710).

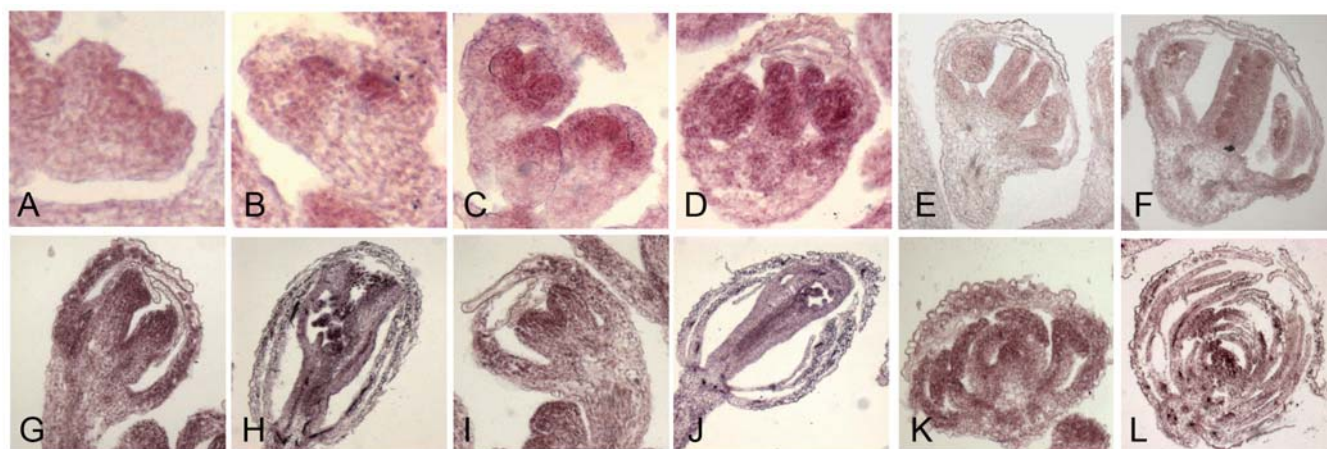

Supplemental Figure 3. In situ expression analyses of BNQ2.

Expression in stage 4 (A), stage 5 (B), stages 4-6 (C), stage 7 (D), stage 8 (E) and late stage (F) WT flowers. Expression in early (G) and late (H) *ap3-3* mutant flowers, in early (I) and late stage (J) *pi-1* mutant flowers, and in early (K) and late stage (L) *ag-1* mutant flowers.

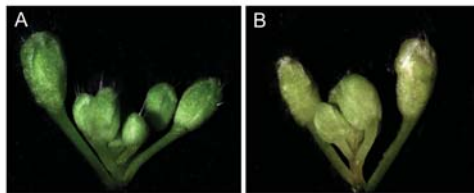

**Supplemental Figure 4. Complementation analysis of *bnq3*.**

Flower buds of *bnq3* homozygous plants transformed with *35S:BNQ3* (A) or *p235* (empty vector) (B). Transgenic plants containing *35S:BNQ3* produce normal flowers with green sepals, indicating that the transgene can complement the pale phenotype of *bnq3*; the empty vector control does not show a similar rescue.

**Supplemental Table 1.**

RT-PCR primer sequences.

|                    |                                                 |
|--------------------|-------------------------------------------------|
| <i>BNQ1 F</i>      | 5'-GGCAATCTTCAAGTGCTCCAAG-3'                    |
| <i>BNQ1 R</i>      | 5'-TTCTAATAACGGCGGCTTCAGGGC-3'                  |
| <i>BNQ2 F</i>      | 5'-ATGTCTTCTAGCAGAAGGTTCGAGACAAGCAAGCTCA-3'     |
| <i>BNQ2 R</i>      | 5'-TTATCCATTAATCAAGCTCCTAATAACTGCGGCTTGTGG-3'   |
| <i>BNQ3 F</i>      | 5'-ATGTCTAGCAGAAAATCACGTT-3'                    |
| <i>BNQ3 R</i>      | 5'-CTACTGCATAAGCAAACCTTCG-3'                    |
| <i>At3g28857 F</i> | 5'-AAAACAAGAAAATGTCTAACAGAAGA-3'                |
| <i>At3g28857 R</i> | 5'-CCAAAGTTCATAAAAAGATAAAAAGCA-3'               |
| <i>At1g26945 F</i> | 5'-AAGCTCCAACACCTCATCCCTGAACT-3'                |
| <i>At1g26945 R</i> | 5'-TTAATAATTAAGCAAGCTCCTAATGATGGCTG-3'          |
| <i>At1g74500 F</i> | 5'-ATGTCGGGAAGAAGATCACGTTTCGAGGCA-3'            |
| <i>At1g74500 R</i> | 5'-TTATTGGGTAAGTAAGCTTCTGATTAAAGCAGCTTGTCACT-3' |
| <i>Actin F</i>     | 5'-GATGGATCCTCCAATCCAGACACTGTA-3'               |
| <i>Actin R</i>     | 5'-GTATTGTGTTGGACTCTGGTGATGGTGT-3'              |

**Supplemental Table 2.**

ChIP PCR primer sequences.

|                 |                                                        |
|-----------------|--------------------------------------------------------|
| <i>BNQ1 F</i>   | 5'-TCACTTTGTAAAATTATTCTATATTTTCTG-3'                   |
| <i>BNQ1 R</i>   | 5'-ATAAACCTCGACAATGATGTCAC-3'                          |
| <i>BNQ2 F1</i>  | 5'-TCAAGCAAAGCTAGGACATGCTATTAAGGAA-3'                  |
| <i>BNQ2 R1</i>  | 5'-CCAAACAATACTTTCACCTTGGATACATTGATAATTTAT-3'          |
| <i>BNQ2 F2</i>  | 5'-TTCCAGTAATAGATACTAAGTTCTACTAAAGTTTTTGA-3'           |
| <i>BNQ2 R2</i>  | 5'-ATAAATACACCGAAGATAGATATATATCTTCTATTTTCTTATAATT-3'   |
| <i>BNQ2 F3</i>  | 5'-CATCACGATCTGATAAATTTGTAAATTCA-3'                    |
| <i>BNQ2 R3</i>  | 5'-AGATAGAGAGAGAGAGAGAGAGCGAGAGT-3'                    |
| <i>BNQ3 F1</i>  | 5'-CCAAAAAAAATATGAAAGAAGGTATCCTCCAATAATCAAAC-3'        |
| <i>BNQ3 R1</i>  | 5'-TTCCACATTATTTTTTTTGTCTAATCCAGTTTTTCATTTTTCTA-3'     |
| <i>BNQ3 F2</i>  | 5'-ATAAATGGAAATGTTTTTCTATATAAGTTTAAAAACATAACGAGAC-3'   |
| <i>BNQ3 R2</i>  | 5'-GACTAGTAGTCTTTAACGAAAGGGAAAAAAACACTCTGAATA-3'       |
| <i>BNQ3 F3</i>  | 5'-TAGAAAAAACATATATAATTTTGTCAATTATATTCCATGCATA-3'      |
| <i>BNQ3 R3</i>  | 5'-ATTTGTGAGTGCAAGTATTTTCTTTGTATGTTATTTATATTATAAGAG-3' |
| <i>AP3 F</i>    | 5'-GATTTAAACAGTGTCTTGTAATTA-3'                         |
| <i>AP3 R</i>    | 5'-GATTTGGTGGAGAGGACAAG-3'                             |
| <i>PI F</i>     | 5'-CATGCAAAGAGTGTCAATTAAGC-3'                          |
| <i>PI R</i>     | 5'-GAAGAGAGAAGTTTGACAGTTTG-3'                          |
| <i>AST101 F</i> | 5'-GACGATCCGGTTTGAATGTC-3'                             |
| <i>AST101 R</i> | 5'-CACAATGGTGAGATGGGAAC-3'                             |

**Supplemental Table 3.***In situ* probe primer sequences.

|                 |                                                        |
|-----------------|--------------------------------------------------------|
| <i>BNQ1 F</i>   | 5'GCAATCTTCACAAGTGCTCCAAC-3'                           |
| <i>BNQ1 RT7</i> | 5'-TATAATACGACTCACTATAGGGGTGTAGGCTTCTATAACGGCG-3'      |
| <i>BNQ2 F</i>   | 5'-CTTGAACAAGGAAGCCGATGACCTCA-3'                       |
| <i>BNQ2 RT7</i> | 5'-ACTAATACGACTCACTATAGGGCTCGAAATCTTATTTATTATAATTTT-3' |
| <i>BNQ3 F</i>   | 5'-ATGTCTAGCAGAAAATCACGTTCAAGA-3'                      |
| <i>BNQ3 RT7</i> | 5'-ACTAATACGACTCACTATAGGGCTACTGCATAAGCAAACCTTCGGATT-3' |

**Supplemental Table 4.**

SALK line and RNAi line primer sequences.

|                  |                                              |
|------------------|----------------------------------------------|
| 98881LP          | 5'-ATGTCTAGCAGAAAATCACGTTCAAGACAA-3'         |
| 98881RP          | 5'-GTCGTTTTTACGTAGTAAACTGCTCTTGTAATAGAAGT-3' |
| Left Border LBA1 | 5'-TGGTTCACGTAGTGGGCCATCG-3'                 |
| Left Border LBB1 | 5'-GCGTGGACCGCTTGCTGCAACT-3'                 |
| BNQ1 (att39F)    | 5'-CCTACTTGCCACATAGACATAGCC- 3'              |
| BNQ1 (att39R)    | 5' -ATGAGTAGGCTTCTAATAACGGCG- 3'             |
| BNQ2 (att15F )   | 5'GCAGGCTCTTGAACAAGGAAGCCGA-3'               |
| BNQ2 (att15R)    | 5'GCTGGGTCTCGAAATCTTATTTATTATAATTT-3'        |
|                  |                                              |

**Supplemental Table 5.**

Overexpression line primer sequences.

|               |                                                           |
|---------------|-----------------------------------------------------------|
| <i>BNQ1 F</i> | 5'-TCTAGAGTGTATTCAAACCCCAAACACTT- 3'                      |
| <i>BNQ1 R</i> | 5'-GGATCCACCTATGAAATTCGTATGTCA- 3'                        |
| <i>BNQ2 F</i> | 5'-TATCGTCTAGAGACAAGCACAAACAAAGCCATCAAGAG-3'              |
| <i>BNQ2 R</i> | 5'-CATTAGGATCCCTCGAAATCTTATTTATTATAATTTTAAAGCTTAATGGAA-3' |
| <i>BNQ3 F</i> | 5'-CGATATCTAGAATGTCTAGCAGAAAATCACGTTCAA-3'                |
| <i>BNQ3 R</i> | 5'-CTACTGGATCCCTACTGCATAAGCAAACCTTCGGAT-3'                |

**Supplemental Table 6.**

Yeast-two-hybrid primer sequences.

|                    |                                                 |
|--------------------|-------------------------------------------------|
| <i>BNQ1 F</i>      | 5'-ACGTAGAATTCATGTGTGTCGAACAGAAGATCAAGGCAA-3'   |
| <i>BNQ1 R</i>      | 5'-ATTCAGGATCCTTACATGAGTAGGCTTCTAATAACGGC-3'    |
| <i>BNQ2 F</i>      | 5'-CAAGTGAATTCATGTCTTCTAGCAGAAGGTCGAGACA-3'     |
| <i>BNQ2 R</i>      | 5'-ATCATGGATCCTTATCCATTAATCAAGCTCCTAATAACTGC-3' |
| <i>BNQ3 F</i>      | 5'-ATACCGAATTCATGTCTAGCAGAAAATCACGTTCAAGA-3'    |
| <i>BNQ3 R</i>      | 5'-CTAAGGGATCCCTACTGCATAAGCAAACCTTCGGATTAGT-3'  |
| <i>At3g28857 F</i> | 5'-ATACGGAATTCATGTCTAACAGAAGATCAAGACAAACTTCG-3' |
| <i>At3g28857 R</i> | 5'-ATTCAGGATCCTTACATGAGTAAGCTTCTAATCACGGC-3'    |
| <i>At1g26945 F</i> | 5'-CATATGGAATTCATGTCTAGCAGAAGATCATCACGT-3'      |
| <i>At1g26945 R</i> | 5'-TGATAGGATCCTTAATAATTAAGCAAGCTCCTAATGAT-3'    |
| <i>At1g74500 F</i> | 5'-CGTATGAATTCATGTGCGGAAGAAGATCACGTT-3'         |
| <i>At1g74500 R</i> | 5'-CGTATGGATCCTTATTGGGTAAGTAAGCTTCTGATTAAA-3'   |
| <i>HFR1 F</i>      | 5'-CTATGGAATTCATGTGCAATAATCAAGCTTTCATGGA-3'     |
| <i>HFR1 R</i>      | 5'-GATCTGGATCCTCATAGTCTTCTCATCGCATGGGA-3'       |
| <i>PIL1 F</i>      | 5'-CATAGGGATCCGTATGGAAGCAAAACCCTTAGCA-3'        |
| <i>PIL1 R</i>      | 5'-CTCGTGGATCCTTAGTTTGGCGAGCGATAATAACTA-3'      |
| <i>PIL5 F</i>      | 5'-ATCGTGAATTCATGGATCCTCAGCAGCAACC-3'           |
| <i>PIL5R</i>       | 5'-GATTAGAATTCCTAACCTGTTGTGTGGTTTCCG-3'         |
| <i>PIF3 F</i>      | 5'-ACTATGGATCCGTATGCCTCTGTTTGAGCTTTTCAG-3'      |
| <i>PIF3R</i>       | 5'-ATCGTGAATTCACGACGATCCACAAAACCTG-3'           |
| <i>PIF4 F</i>      | 5'-CGATAGAATTCATGGAACACCAAGGTTGGAGTT-3'         |
| <i>PIF4 R</i>      | 5'-TACTAGAATCCCTAGTGGTCCAAACGAGAACCGT-3'        |
